# Supplementary material for: Comprehensive homing endonuclease target site specificity profiling reveals evolutionary constraints and enables genome engineering applications
Source: PubMed Central journal article supplement — Nucleic Acids Res. 2011 Nov 25;40(6):2587–98. doi: 10.1093/nar/gkr1072 (PMC3315327; doi:10.1093/nar/gkr1072), 2011-11-25
Supplement: supp_gkr1072_nar-01664-f-2011-File008.pdf [file supp_gkr1072_nar-01664-f-2011-File008.pdf]

**Supplementary Information for *Nucleic Acids Research* ms:**

**‘Comprehensive target site specificity profiling reveals homing endonuclease evolutionary constraints and enables genome engineering applications’**

Authors: Hui Li, Umut Ulge, Blake T. Hovde, Lindsey Doyle and Raymond J. Monnat, Jr.

***Note: This supplement contains 4 Supplementary Figures and Legends and 1 Supplementary Table***

## Supplementary Figure S1

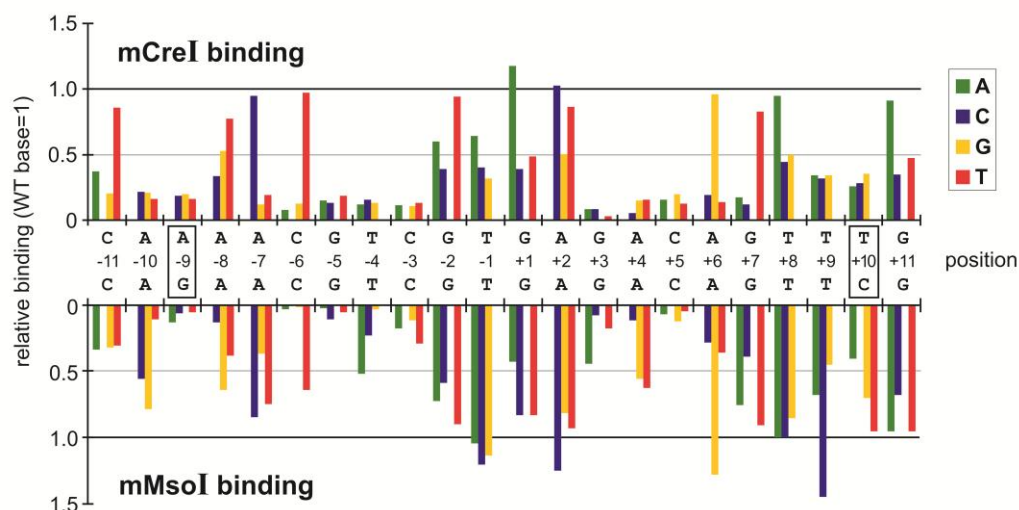

**Supplementary Figure 1. Comparative binding specificity profiles for mCrel and mMsoI.** The relative binding affinities of mCrel (top panel) and mMsoI (bottom panel) for all four base pairs at each target site position were determined by competitive binding (19). Target site positions that differ between the I-Crel and I-Msol target sites are shown in boxes (-9 and +10). Bar heights indicate binding affinity for alternative base pairs relative to the native base pair, whose binding affinity has been arbitrarily set to 1.0. All results are the mean of three replications in which the standard deviation between experiments was  $\pm 5\%$ . Error bars have been omitted for graphical clarity.

## Supplementary Figure S2

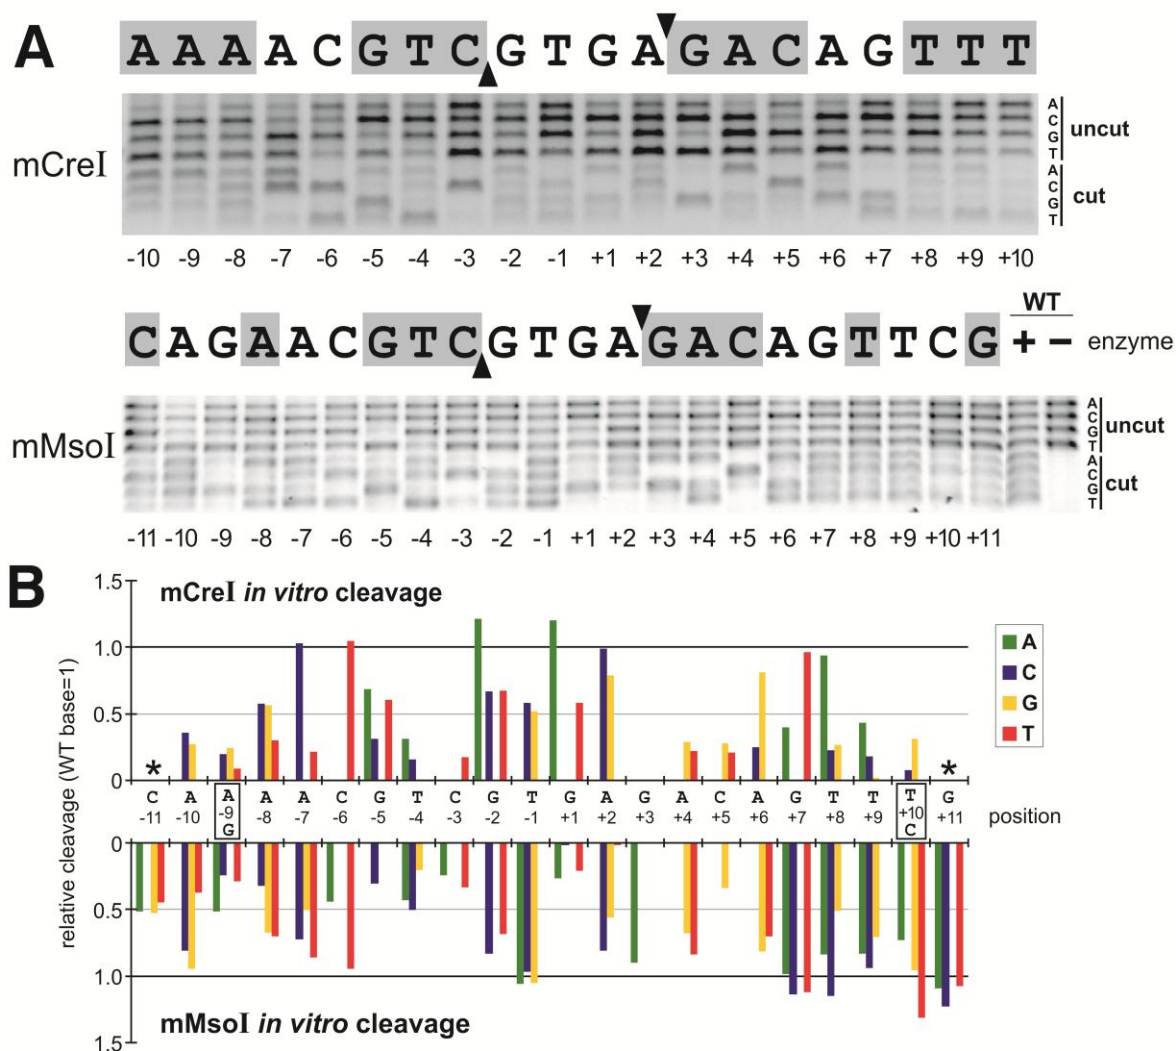

### Supplementary Figure 2. Comparative cleavage specificity profiles for mCrel and mMsoI. (A)

Agarose gels of *in vitro* cleavage specificity profiles for mCrel and mMsoI, determined as described in Figure 3 by a competitive 'bar code' cleavage assay. (B) The relative cleavage efficiencies of mCrel (top panel) and mMsoI (bottom panel) on target sites containing base substitutions relative to the cleavage efficiency of the native base pair plotted as in Figure 2. Asterisks indicate positions where we could not determine a difference measure due to an absence of mCrel data. All results are the mean of three replicates in which the standard deviations were  $\pm 5\%$ . Error bars have been omitted for graphical clarity.

## Supplementary Figure S3

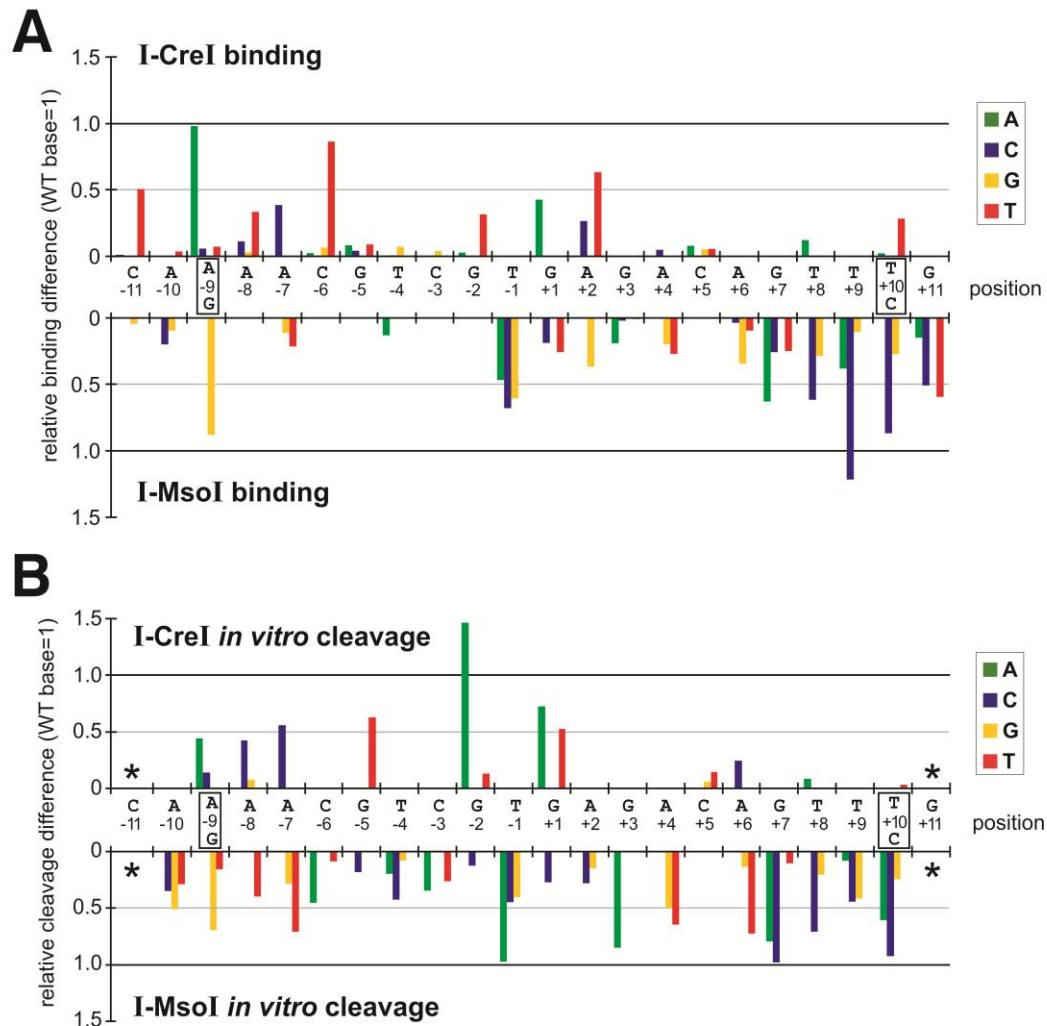

**Supplementary Figure 3. Difference plot of I-CreI and I-MsoI *in vitro* binding and cleavage profiles.** (A) Difference plot of binding of I-CreI (top panel) *versus* I-MsoI (bottom panel), where bar direction indicates the better binder (up = I-CreI>I-MsoI; down = I-MsoI>I-CreI) and the bar height indicates the difference in relative binding. Base pair positions that differ between the I-CreI and I-MsoI target sites are shown in boxes. (B) Difference plot of cleavage efficiencies of I-CreI (top panel) *versus* I-MsoI (bottom panel), where bar direction indicates the better cleaver (up = I-CreI>I-MsoI; down = I-MsoI>I-CreI) and the bar height indicates the difference in relative cleavage. Asterisks indicate positions where we lack cleavage data for I-CreI, and thus could not determine a difference measure.

## Supplementary Figure S4

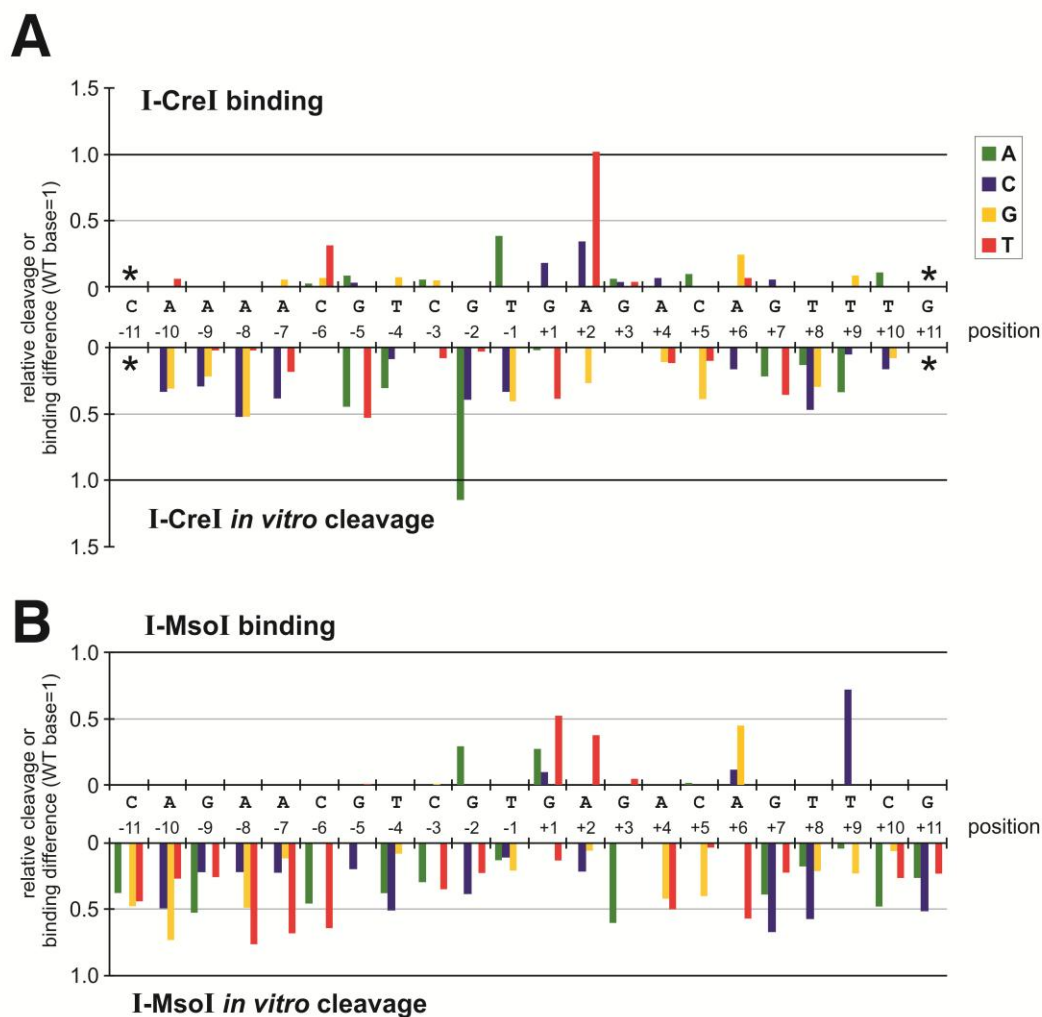

**Supplementary Figure 4. Difference plot of I-CreI and I-MsoI *in vitro* binding versus cleavage specificity profiles.** Difference plots of binding versus cleavage profiles for I-CreI (A) and I-MsoI (B) where bar direction indicates better binding (up) or cleavage (down) for each enzyme across all target site positions and bar heights the magnitude of the binding or cleavage differential. These plots readily reveal base pair substitutions that have a disproportionate effect on binding or cleavage. Asterisks indicate positions where we lack data for I-CreI cleavage, and could not determine a difference measure.

**Supplementary Table 1. Blastn results of I-Crel/I-Msol target sites with two symmetric base pair changes.**

Two positions in I-Crel/I-Msol target sites were changed symmetrically to maintain the ribosomal RNA secondary structure depicted in Figure 6A, and cleavage sensitivity of the resultant target site variants was predicted based on combined relative cleavage activities from Figure 3. For I-Crel/mCrel, the target site variant with -7C and +8G changes is predicted to be the most cleavage sensitive. For I-Msol, the target site variants with -6T/+7A, -7T/+8A changes are predicted to be the most cleavage sensitive. For both HEs, the target site variant with -3G and +3C changes is predicted to be the most cleavage resistant. The perfect matches of these target site variants were searched using Blastn. Only 75 perfect matches are found for I-Crel target site variant with -7C and +8G changes, 55 of which are identified as ribosome large subunit (LSU) genes. No perfect match is found for the remaining high-scoring target site variants.

|        | Target site sequence   | Changes  | Sum of relative cleavage activity (WT=2) | Blastn results |
|--------|------------------------|----------|------------------------------------------|----------------|
| I-Crel | AAAcCGTCGTGAGACAGgTT   | -7C, +8G | 1.68                                     | 75(55)         |
|        | AAAACGTgGTGAcACAGTTT   | -3G, +3C | 0                                        | 0              |
| I-Msol | CAGAAtGTCGTGAGACAaTTCG | -6T, +7A | 2.04                                     | 0              |
|        | CAGAtCGTCGTGAGACAGaTCG | -7T, +8A | 2.03                                     | 0              |
|        | CAGAACGTgGTGAcACAGTTCG | -3G, +3C | 0                                        | 0              |
